# Supplementary material for: Chromosome structure in Drosophila is determined by boundary pairing not loop extrusion
Source: eLife. 2024 Aug 7;13:RP94070. doi: 10.7554/eLife.94070 (PMC11305675; doi:10.7554/eLife.94070)
Supplement: Supplementary file 1. [file elife-94070-supp1.xlsx]

## Sheet: Sheet1
Supplemental data S3, quantification for LeimohG and LhomieG
LeimohG													LhomieG
		LacZ			GFP				Normalized signal (signal to noise)						LacZ			GFP				Normalized signal (signal to noise)
Rep1	embryo#	signal	background	signal to noise	signal	background	signal to noise		LacZ	GFP			Rep1	embryo#	signal	background	signal to noise	signal	background	signal to noise		LacZ	GFP
	1	437.876	457.474	-19.598	582.245	427.051	155.194		-19.598	147.69				1	635.389	501.055	134.334	693.281	611.06	82.221		134.334	82.3452
	2	446.024	394.538	51.486	534.951	338.729	196.222		51.486	186.734				2	950.882	635.678	315.204	404.632	426.649	-22.017		315.204	-22.0503
	3	389.12	400.337	-11.217	562.817	359.652	203.165		-11.217	193.342				3	840.918	520.722	320.196	598.785	605.776	-6.991		320.196	-7.00156
	4	538.742	525.749	12.993	739.591	618.939	120.652		12.993	114.818				4	568.09	517.341	50.749	813.689	892.067	-78.378		50.749	-78.4964
	5	438.663	425.472	13.191	629.673	441.941	187.732		13.191	178.655				5	822.424	501.773	320.651	513.764	591.928	-78.164		320.651	-78.2821
	6	487.526	401.991	85.535	591.115	404.959	186.156		85.535	177.155				6	680.682	541.822	138.86	597.163	503.483	93.68		138.86	93.8215
	7	398.673	389.619	9.054	620.587	510.975	109.612		9.054	104.312				7	767.486	631.071	136.415	431.318	404.761	26.557		136.415	26.5971
	8	416.703	436.196	-19.493	549.741	503.473	46.268		-19.493	44.0309				8	831.046	673.327	157.719	483.399	480.244	3.155		157.719	3.15977
		average background	428.922		average background	450.715									average background	565.349		average background	564.496
					Background normalization factor:	1.05081												Background normalization factor:	0.998492
		LacZ			GFP				Normalized signal (signal to noise)						LacZ			GFP				Normalized signal (signal to noise)
	embryo#	signal	background	signal to noise	signal	background	signal to noise		LacZ	GFP				embryo#	signal	background	signal to noise	signal	background	signal to noise		LacZ	GFP
Rep2	1	237.198	271.536	-34.338	344.41	309.486	34.924		-34.338	26.736			Rep2	1	802.126	307.28	494.846	341.072	352.113	-11.041		494.846	-8.8423
	2	300.276	284.888	15.388	763.049	314.722	448.327		15.388	343.216				2	472.554	370.611	101.943	372.145	466.548	-94.403		101.943	-75.6036
	3	142.51	212.336	-69.826	421.199	272.728	148.471		-69.826	113.662				3	339.463	338.254	1.209	480.936	556.722	-75.786		1.209	-60.694
	4	266.525	268.582	-2.057	514.102	348.496	165.606		-2.057	126.779				4	435.67	330.274	105.396	430.921	486.564	-55.643		105.396	-44.5623
	5	254.796	246.345	8.451	537.115	308.705	228.41		8.451	174.859				5	480.068	379.632	100.436	492.609	508.333	-15.724		100.436	-12.5927
	6	234.769	291.463	-56.694	624.152	342.81	281.342		-56.694	215.381				6	442.518	315.046	127.472	411.72	451.495	-39.775		127.472	-31.8542
	7	211.348	204.371	6.977	501.042	420.182	80.86		6.977	61.9022				7	588.688	342.109	246.579	316.27	317.849	-1.579		246.579	-1.26456
	8	287.834	262.273	25.561	573.154	349.974	223.18		25.561	170.855				8	751.046	449.225	301.821	355.483	397.111	-41.628		301.821	-33.3382
		average background	255.224		average background	333.388									average background	354.054		average background	442.092
					Background normalization factor:	1.30625												Background normalization factor:	1.24866
		LacZ			GFP				Normalized signal (signal to noise)						LacZ			GFP				Normalized signal (signal to noise)
	embryo#	signal	background	signal to noise	signal	background	signal to noise		LacZ	GFP				embryo#	signal	background	signal to noise	signal	background	signal to noise		LacZ	GFP
Rep3	1	240.866	231.027	9.839	384.404	266.856	117.548		9.839	93.7873			Rep3	1	517.744	356.961	160.783	327.071	402.447	-75.376		160.783	-63.0707
	2	238.196	223.351	14.845	509.877	272.589	237.288		14.845	189.323				2	532.822	328.619	204.203	444.856	355.095	89.761		204.203	75.1074
	3	231.33	251.427	-20.097	498.442	273.809	224.633		-20.097	179.227				3	525.861	381.29	144.57	418.926	490.602	-71.676		144.57	-59.9748
	4	219.252	301.378	-82.126	384.485	330.336	54.149		-82.126	43.2035				4	511.671	375.002	136.669	528.308	588.669	-60.361		136.669	-50.507
	5	283.346	264.898	18.448	513.518	289.734	223.784		18.448	178.549				5	564.682	314.189	250.493	317.244	327.527	-10.283		250.493	-8.60428
	6	284.071	248.731	35.34	572.781	407.812	164.969		35.34	131.623				6	611.575	355.367	256.208	501.967	342.476	159.491		256.208	133.454
	7	293.246	213.341	79.905	497.005	377.458	119.547		79.905	95.3822				7	574.449	393.124	181.325	472.197	450.943	21.254		181.325	17.7842
	8	273.331	294.575	-21.244	467.197	324.106	143.091		-21.244	114.167				8	536.731	356.591	180.14	477.568	461.6	15.968		180.14	13.3612
		average background	253.591		average background	317.837									average background	357.643		average background	427.42
					Background normalization factor:	1.25335												Background normalization factor:	1.1951
