# Supplementary material for: Chromosome structure in Drosophila is determined by boundary pairing not loop extrusion
Source: eLife. 2024 Aug 7;13:RP94070. doi: 10.7554/eLife.94070 (PMC11305675; doi:10.7554/eLife.94070)
Supplement: Supplementary file 2. [file elife-94070-supp2.docx]

Supplemental Data S1. smFISH probes

| **Reagents** | **Source** | **Identifier** |
| --- | --- | --- |
| smFISH probe sets | Biosearch Technologies |  |
| Details below: | | |
| Probes set name | Target | Sequence |
| WK_EGFP | EGFP | cggtgaacagctcctcgc |
| cagctcgaccaggatggg |
| ttgtggccgtttacgtcg |
| tcgccggacacgctgaac |
| acttcagggtcagcttgc |
| ttgccggtggtgcagatg |
| agggtggtcacgagggtg |
| cactgcacgccgtaggtc |
| tcggggtagcggctgaag |
| agtcgtgctgcttcatgt |
| ggcatggcggacttgaag |
| tcctggacgtagccttcg |
| ccgtcgtccttgaagaag |
| gcgcgggtcttgtagttg |
| tgtcgccctcgaacttca |
| cagctcgatgcggttcac |
| cttgaagtcgatgccctt |
| caggatgttgccgtcctc |
| ttgtactccagcttgtgc |
| agacgttgtggctgttgt |
| gcttgtcggccatgatat |
| ccttgatgccgttcttct |
| ggcggatcttgaagttca |
| ctgccgtcctcgatgttg |
| gtagtggtcggcgagctg |
| gatgggggtgttctgctg |
| ttgtcgggcagcagcacg |
| gactgggtgctcaggtag |
| gttggggtctttgctcag |
| catgtgatcgcgcttctc |
| ggtcacgaactccagcag |
| atgccgagagtgatcccg |
| tacttgtacagctcgtcc |
| WK_LacZ | LacZ | tttgaggggacgacgacagtat |
| ataggttacgttggtgtagatg |
| aaacggcggattgaccgtaatg |
| ccagctttcatcaacattaaat |
| tcaaaaataattcgcgtctggc |
| acagatgaaacgccgagttaac |
| caaattcagacggcaaacgact |
| ttttctccggcgcgtaaaaatg |
| atatcctgatcttccagataac |
| aacgagacgtcacggaaaatgc |
| tggaaatcgctgatttgtgtag |
| aatcatcattaaagcgagtggc |
| cctgccataaagaaactgttac |
| atcgataatttcaccgccgaaa |
| ttttcgacgttcagacgtagtg |
| cacgatagagattcgggatttc |
| gatgatgctcgtgacggttaac |
| taaagttgttctgcttcatcag |
| atggttcggataatgcgaacag |
| tttcaatattggcttcatccac |
| atcatcggtcagacgattcatt |
| atgatcacactcgggtgattac |
| ggaaggatcgacagatttgatc |
| catcgggcaaataatatcggtg |
| tagcgaaagccattttttgatg |
| tatttagcgaaaccgccaagac |
| tgtaaacggggatactgacgaa |
| tgccgttttcatcatatttaat |
| aaagaccagaccgttcatacag |
| aaaactgctgctggtgttttgc |
| tttgcccggataaacggaactg |
| cgttatcgctatgacggaacag |
| tcaatcaactgtttaccttgtg |
| ctcgatgcaaaaatccatttcg |
| gttaaattgccaacgcttatta |
| catctgtgaaagaaagcctgac |
| cagttgttttttatcgccaatc |
| cacttacgccaatgtcgttatc |
| ccggctgataaataaggttttc |
| catttgaccactaccatcaatc |
| cacttcaacatcaacggtaatc |
| ggtcaaaacaggcggcagtaag |
| tatacatgtctgacaatggcag |
| gtgtgggccataattcaattcg |
| gctgatgttgaactggaagtcg |
| catcagttgctgttgactgtag |
| tatggaaaccgtcgatattcag |
| tatttttgacaccagaccaact |
