# Supplementary material for: Chromosome structure in Drosophila is determined by boundary pairing not loop extrusion
Source: eLife. 2024 Aug 7;13:RP94070. doi: 10.7554/eLife.94070 (PMC11305675; doi:10.7554/eLife.94070)
Supplement: Supplementary file 3. [file elife-94070-supp3.xlsx]

## Sheet: Data identifier
Data notes
Label in manuscript	WK stock #	stock Name	Insert	insert orientation	insertion site	Slide ID	embryo stage	Replicate #
LlambdaG	WK18	Z-λ500-G	Z-λ500-G	Z5	-142 eve	197	early	Replicate 1
LlambdaG	WK18	Z-λ500-G	Z-λ500-G	Z5	-142 eve	202	early	Replicate 2
LlambdaG	WK18	Z-λ500-G	Z-λ500-G	Z5	-142 eve	207	early	Replicate 3
LlambdaG	WK18	Z-λ500-G	Z-λ500-G	Z5	-142 eve	193	Late	Replicate 1
LlambdaG	WK18	Z-λ500-G	Z-λ500-G	Z5	-142 eve	197	Late	Replicate 2
LlambdaG	WK18	Z-λ500-G	Z-λ500-G	Z5	-142 eve	202	Late	Replicate 3
LhomieG	WK2	Z-CDEF-G	Z-CDEF-G	Z5	-142 eve	195	early	Replicate 1
LhomieG	WK2	Z-CDEF-G	Z-CDEF-G	Z5	-142 eve	199	early	Replicate 2
LhomieG	WK2	Z-CDEF-G	Z-CDEF-G	Z5	-142 eve	204	early	Replicate 3
LhomieG	WK2	Z-CDEF-G	Z-CDEF-G	Z5	-142 eve	138	early	Replicate 4
LhomieG	WK2	Z-CDEF-G	Z-CDEF-G	Z5	-142 eve	147	early	Replicate 5
LhomieG	WK2	Z-CDEF-G	Z-CDEF-G	Z5	-142 eve	209	Late	Replicate 1
LhomieG	WK2	Z-CDEF-G	Z-CDEF-G	Z5	-142 eve	195	Late	Replicate 2
LhomieG	WK2	Z-CDEF-G	Z-CDEF-G	Z5	-142 eve	199	Late	Replicate 3
LhomieG	WK2	Z-CDEF-G	Z-CDEF-G	Z5	-142 eve	204	Late	Replicate 4
LhomieG	WK2	Z-CDEF-G	Z-CDEF-G	Z5	-142 eve	138	Late	Replicate 5
LhomieG	WK2	Z-CDEF-G	Z-CDEF-G	Z5	-142 eve	147	Late	Replicate 6
LeimohG	WK3	Z-FEDC-G	Z-FEDC-G	Z5	-142 eve	196	early	Replicate 1
LeimohG	WK3	Z-FEDC-G	Z-FEDC-G	Z5	-142 eve	205	early	Replicate 2
LeimohG	WK3	Z-FEDC-G	Z-FEDC-G	Z5	-142 eve	130	early	Replicate 3
LeimohG	WK3	Z-FEDC-G	Z-FEDC-G	Z5	-142 eve	139	early	Replicate 4
LeimohG	WK3	Z-FEDC-G	Z-FEDC-G	Z5	-142 eve	148	early	Replicate 5
LeimohG	WK3	Z-FEDC-G	Z-FEDC-G	Z5	-142 eve	210	Late	Replicate 1
LeimohG	WK3	Z-FEDC-G	Z-FEDC-G	Z5	-142 eve	196	Late	Replicate 2
LeimohG	WK3	Z-FEDC-G	Z-FEDC-G	Z5	-142 eve	205	Late	Replicate 3
LeimohG	WK3	Z-FEDC-G	Z-FEDC-G	Z5	-142 eve	130	Late	Replicate 4
LeimohG	WK3	Z-FEDC-G	Z-FEDC-G	Z5	-142 eve	139	Late	Replicate 5
LeimohG	WK3	Z-FEDC-G	Z-FEDC-G	Z5	-142 eve	148	Late	Replicate 6
LeimohG

## Sheet: WK18_Early_embryos
WK stock #	Name	Insert	insert orientation	insertion site
18	LlambdaG	Z-λ500-G	Z5	-142 eve
Replicate 1
Imaging date	20220219
Embryo sample #	WK193
Probes	GFP 546, LacZ 633
	Channel 561			Channel 633				Normalized signal (signal to noise)
Sample ID	signal	backround	signal to noise	signal	backround	signal to noise		Channel 561	Channel 633
197-001	201	183	18	195	192	3		18	3.77638
197-002	361	372	-11	347	368	-21		-11	-26.4347
197-003	270	251	19	251	238	13		19	16.3643
197-004	426	385	41	252	226	26		41	32.7286
197-005	372	362	10	325	330	-5		10	-6.29396
197-006	403	377	26	199	220	-21		26	-26.4347
197-007	290	267	23	230	249	-19		23	-23.9171
197-008	391	373	18	237	228	9		18	11.3291
197-009	340	329	11	250	252	-2		11	-2.51759
	Average background:	322.111		Average:	255.889
				Background normalization factor:	0.794412
Replicate 2
Imaging date	20220219
Embryo sample #	WK197
Probes	GFP 546, LacZ 633
	Channel 561 (orange channel 2)			Channel 633 (red or cyan channel 3)					Normalized signal (signal to noise)
Sample ID	signal	backround	signal to noise	signal	backround	signal to noise		Channel 561	Channel 633
202-0000	196	221	-25	187	187	0		-25	0
202-000	233	245	-12	212	215	-3		-12	-3.44385
202-001	227	249	-22	198	207	-9		-22	-10.3316
202-002	224	251	-27	197	202	-5		-27	-5.73976
202-003	245	253	-8	192	222	-30		-8	-34.4385
202-004	190	220	-30	180	187	-7		-30	-8.03566
202-005	240	255	-15	199	219	-20		-15	-22.959
202-006	240	220	20	205	190	15		20	17.2193
202-007	254	243	11	243	250	-7		11	-8.03566
	Average background:	239.667		Average:	208.778
				Background normalization factor:	0.871117
Replicate 3
Imaging date	20220219
Embryo sample #	WK202
Probes	GFP 546, LacZ 633
	Channel 561 (orange channel 2)			Channel 633 (red or cyan channel 3)					Normalized signal (signal to noise)
Sample ID	signal	backround	signal to noise	signal	backround	signal to noise		Channel 561	Channel 633
207-001	233	257	-24	265	285	-20		-24	-20.6778
207-002	224	218	6	201	195	6		6	6.20333
207-003	238	227	11	200	205	-5		11	-5.16944
207-004	193	205	-12	110	127	-17		-12	-17.5761
207-005	183	175	8	175	165	10		8	10.3389
207-006	119	120	-1	228	219	9		-1	9.305
207-007	175	166	9	239	222	17		9	17.5761
207-008	195	172	23	163	147	16		23	16.5422
207-009	283	260	23	176	176	0		23	0
	Average background:	200		Average:	193.444
				Background normalization factor:	0.967222

## Sheet: WK18_Late_embryos
WK stock #	Name	Insert	insert orientation	insertion site
18	LlambdaG	Z-λ500-G	Z5	-142 eve
Replicate 1
Imaging date	20220219
Embryo sample #	WK193
Probes	GFP 546, LacZ 633
	Channel 561			Channel 633					Normalized signal (signal to noise)
Sample ID	signal	backround	signal to noise	signal	backround	signal to noise		Channel 561	Channel 633
193-001	216	207	9	294	276	18		9	12.5336
193-002	202	196	6	307	268	39		6	27.156
193-005	180	190	-10	216	236	-20		-10	-13.9262
193-006	259	235	24	436	410	26		24	18.104
193-007	222	209	13	362	353	9		13	6.26678
193-008	186	190	-4	247	251	-4		-4	-2.78523
193-009	210	230	-20	322	319	3		-20	2.08893
193-010	189	203	-14	269	271	-2		-14	-1.39262
	Average background:	207.5		Average:	298
				Background normalization factor:	1.43614
Replicate 2
Imaging date	20220219
Embryo sample #	WK197
Probes	GFP 546, LacZ 633
	Channel 561 (orange channel 2)			Channel 633 (red or cyan channel 3)					Normalized signal (signal to noise)
Sample ID	signal	backround	signal to noise	signal	backround	signal to noise		Channel 561	Channel 633
197-001	231	218	13	201	195	6		13	6.28545
197-002	223	208	15	195	194	1		15	1.04758
197-003	214	227	-13	242	223	19		-13	19.9039
197-004	247	261	-14	268	286	-18		-14	-18.8564
197-005	186	174	12	187	172	15		12	15.7136
197-006	270	262	8	280	267	13		8	13.6185
197-007	235	219	16	186	189	-3		16	-3.14273
197-008	264	249	15	230	215	15		15	15.7136
197-009	234	246	-12	243	227	16		-12	16.7612
197-010	193	226	-33	188	218	-30		-33	-31.4273
	Average background:	229		Average:	218.6
				Background normalization factor:	0.954585
Replicate 3
Imaging date	20220219
Embryo sample #	WK202
Probes	GFP 546, LacZ 633
	Channel 561 (orange channel 2)			Channel 633 (red or cyan channel 3)					Normalized signal (signal to noise)
Sample ID	signal	backround	signal to noise	signal	backround	signal to noise		Channel 561	Channel 633
202-002	217	209	8	219	202	17		8	18.496
202-003	205	201	4	180	173	7		4	7.616
202-004	239	235	4	251	236	15		4	16.32
202-005	195	189	6	171	167	4		6	4.352
202-006	189	185		170	165	5		0	5.44
202-007	192	186	6	165	169	-4		6	-4.352
202-008	185	181	4	157	162	-5		4	-5.44
202-009	205	201	4	173	175	-2		4	-2.176
202-010	174	181	-7	167	176	-9		-7	-9.792
	Average background:	196.444		Average:	180.556
				Background normalization factor:	0.919118

## Sheet: WK2_Early_embryos
WK stock #	Name	Insert	insert orientation	insertion site
2	LhomieG	Z-CDEF-G	Z5	-142 eve
Replicate 1
Imaging date	20220119
Embryo sample #	WK195
Probes	GFP 546, LacZ 633
	Channel 561 (orange channel 2)			Channel 633 (red or cyan channel 3)					Normalized signal (signal to noise)
Sample ID	signal	backround	signal to noise	signal	backround	signal to noise		Channel 561	Channel 633
195-001	300	332	-32	310	290	20		-32	24.295
195-002	289	305	-16	412	229	183		-16	222.299
195-003	277	300	-23	222	230	-8		-23	-9.718
195-004	322	331	-9	285	265	20		-9	24.295
195-005	280	277	3	285	227	58		3	70.4555
195-006	360	372	-12	321	290	31		-12	37.6573
195-007	250	237	13	231	204	27		13	32.7983
195-008	180	195	-15	200	181	19		-15	23.0803
195-009	230	228	2	210	199	11		2	13.3623
195-010	220	223	-3	198	190	8		-3	9.718
	Average background:	280		Average:	230.5
				Background normalization factor:	0.823214
Replicate 2
Imaging date	20220119
Embryo sample #	WK199
Probes	GFP 546, LacZ 633
	Channel 561 (orange channel 2)			Channel 633 (red or cyan channel 3)					Normalized signal (signal to noise)
Sample ID	signal	backround	signal to noise	signal	backround	signal to noise		Channel 561	Channel 633
199-001	370	383	-13	270	263	7		-13	11.6958
199-002	390	409	-19	321	326	-5		-19	-8.35416
199-003	399	397	2	347	211	136		2	227.233
199-004	417	420	-3	243	218	25		-3	41.7708
199-005	408	404	4	234	230	4		4	6.68333
199-006	400	413	-13	293	231	62		-13	103.592
199-007	408	429	-21	211	223	-12		-21	-20.05
199-008	319	365	-46	279	214	65		-46	108.604
199-009	339	309	30	238	183	55		30	91.8957
199-010	304	349	-45	256	222	34		-45	56.8083
	Average background:	387.8		Average:	232.1
				Background normalization factor:	0.598504
Replicate 3
Imaging date	20220219
Embryo sample #	WK204
Probes	GFP 546, LacZ 633
	Channel 561 (orange channel 2)			Channel 633 (red or cyan channel 3)					Normalized signal (signal to noise)
Sample ID	signal	backround	signal to noise	signal	backround	signal to noise		Channel 561	Channel 633
204-001	279	282	-3	226	209	17		-3	21.3629
204-002	250	257	-7	206	201	5		-7	6.28321
204-003	261	274	-13	232	208	24		-13	30.1594
204-004	272	262	10	242	231	11		10	13.8231
204-005	270	279	-9	250	219	31		-9	38.9559
204-006	293	278	15	313	215	98		15	123.151
204-007	280	273	7	339	209	130		7	163.363
204-008	218	227	-9	205	192	13		-9	16.3363
204-009	219	233	-14	207	198	9		-14	11.3098
	Average background:	262.778		Average:	209.111
				Background normalization factor:	0.795772
Replicate 4
Imaging date	20220112
Embryo sample #	WK138
Probes	GFP 546, LacZ 633
	Channel 561 (orange channel 2)			Channel 633 (red or cyan channel 3)					Normalized signal (signal to noise)
Sample ID	signal	backround	signal to noise	signal	backround	signal to noise		Channel 561 (orange channel 2)	Channel 633 (red or cyan channel 3)
138-001	329	324	5	333	212	121		5	175.264
138-002	272	286	-14	261	185	76		-14	110.083
138-003	310	281	29	206	189	17		29	24.6239
138-004	262	291	-29	295	183	112		-29	162.228
138-005	277	290	-13	300	184	116		-13	168.022
138-006	223	213	10	209	170	39		10	56.4901
138-007	196	194	2	168	167	1		2	1.44846
138-008	278	243	35	269	175	94		35	136.156
	Average background:	265.25		Average:	183.125
				Background normalization factor:	0.690386
Replicate 5
Imaging date	20220111
Embryo sample #	WK147
Probes	GFP 546, LacZ 633
	Channel 561 (orange channel 2)			Channel 633 (red or cyan channel 3)					Normalized signal (signal to noise)
Sample ID	signal	backround	signal to noise	signal	backround	signal to noise		Channel 561 (orange channel 2)	Channel 633 (red or cyan channel 3)
147-001	257	257	0	276	189	87		0	118.085
147-002	273	256	17	298	208	90		17	122.157
147-003	296	261	35	249	196	53		35	71.9369
147-004	300	280	20	198	206	-8		20	-10.8584
147-005	290	269	21	296	191	105		21	142.517
147-006	276	261	15	212	180	32		15	43.4336
147-007	291	266	25	292	193	99		25	134.373
	Average background:	264.286		Average:	194.714
				Background normalization factor:	0.736757

## Sheet: WK2_Late_embryos
WK stock #	Name	Insert	insert orientation	insertion site
2	LhomieG	Z-CDEF-G	Z5	-142 eve
Replicate 1
Imaging date	20220309
Embryo sample #	WK209
Probes	GFP 546, LacZ 633
	Channel 561 (orange channel 2)			Channel 633 (red or cyan channel 3)					Normalized signal (signal to noise)
Sample ID	signal	backround	signal to noise	signal	backround	signal to noise		Channel 561	Channel 633
209-001	298	290	8	215	188	27		8	41.5351
209-002	307	304	3	252	234	18		3	27.6901
209-003	371	380	-9	265	222	43		-9	66.1486
209-005	304	308	-4	242	207	35		-4	53.8419
209-006	309	323	-14	282	196	86		-14	132.297
209-007	311	330	-19	267	207	60		-19	92.3003
209-008	341	339	2	225	209	16		2	24.6134
209-009	219	232	-13	225	189	36		-13	55.3802
209-010	370	383	-13	286	226	60		-13	92.3003
	Average background:	321		Average:	208.667
				Background normalization factor:	0.650052
Replicate 2
Imaging date	20220119
Embryo sample #	WK195
Probes	GFP 546, LacZ 633
	Channel 561 (orange channel 2)			Channel 633 (red or cyan channel 3)					Normalized signal (signal to noise)
Sample ID	signal	backround	signal to noise	signal	backround	signal to noise		Channel 561	Channel 633
195-001	354	275	79	326	214	112		79	143.277
195-002	338	266	72	290	200	90		72	115.133
195-003	354	309	45	280	232	48		45	61.4044
195-004	317	207	110	294	207	87		110	111.296
195-005	351	285	66	299	215	84		66	107.458
195-006	329	278	51	278	218	60		51	76.7555
195-007	336	306	30	307	227	80		30	102.341
195-008	346	299	47	341	249	92		47	117.692
195-009	352	298	54	292	227	65		54	83.1518
195-010	335	308	27	286	224	62		27	79.3141
	Average background:	283.1		Average:	221.3
				Background normalization factor:	0.781703
Replicate 3
Imaging date	20220219
Embryo sample #	WK199
Probes	GFP 546, LacZ 633
	Channel 561 (orange channel 2)			Channel 633 (red or cyan channel 3)					Normalized signal (signal to noise)
Sample ID	signal	backround	signal to noise	signal	backround	signal to noise		Channel 561	Channel 633
199-001	329	272	57	299	240	59		57	89.6761
199-002	402	349	53	219	233	-14		53	-21.2791
199-003	487	394	93	381	341	40		93	60.7973
199-004	376	368	8	311	255	56		8	85.1163
199-005	396	397	-1	350	247	103		-1	156.553
199-006	416	426	-10	280	228	52		-10	79.0365
199-007	480	402	78	289	223	66		78	100.316
199-008	417	326	91	323	234	89		91	135.274
199-009	357	328	29	305	201	104		29	158.073
199-010	372	398	-26	295	206	89		-26	135.274
	Average background:	366		Average:	240.8
				Background normalization factor:	0.657923
Replicate 4
Imaging date	20220219
Embryo sample #	WK204
Probes	GFP 546, LacZ 633
	Channel 561 (orange channel 2)			Channel 633 (red or cyan channel 3)					Normalized signal (signal to noise)
Sample ID	signal	backround	signal to noise	signal	backround	signal to noise		Channel 561 (orange channel 2)	Channel 633 (red or cyan channel 3)
204-002	245	171	74	405	209	196		74	208.015
204-003	340	281	59	351	216	135		59	143.275
204-004	286	245	41	289	184	105		41	111.436
204-005	280	269	11	293	223	70		11	74.2909
204-006	247	238	9	279	208	71		9	75.3522
204-007	242	239	3	290	280	10		3	10.613
204-008	377	352	25	406	342	64		25	67.9231
204-009	309	268	41	368	299	69		41	73.2296
204-010	290	257	33	381	225	156		33	165.563
	Average background:	257.778		Average:	242.889
				Background normalization factor:	0.942241
Replicate 5
Imaging date	20220111
Embryo sample #	WK138
Probes	GFP 546, LacZ 633
	Channel 561 (orange channel 2)			Channel 633 (red or cyan channel 3)					Normalized signal (signal to noise)
Sample ID	signal	backround	signal to noise	signal	backround	signal to noise		Channel 561 (orange channel 2)	Channel 633 (red or cyan channel 3)
138-001	290	251	39	282	200	82		39	106.882
138-002	326	275	51	306	210	96		51	125.13
138-003	283	238	45	287	178	109		45	142.074
138-004	310	275	35	386	202	184		35	239.832
138-005	324	267	57	294	190	104		57	135.557
138-006	334	269	65	314	219	95		65	123.826
138-007	285	243	42	292	192	100		42	130.344
138-008	344	314	30	353	256	97		30	126.433
138-009	340	280	60	331	211	120		60	156.412
138-010	399	320	79	428	238	190		79	247.653
	Average background:	273.2		Average:	209.6
				Background normalization factor:	0.767204
Replicate 6
Imaging date	20220111
Embryo sample #	WK147
Probes	GFP 546, LacZ 633
	Channel 561 (orange channel 2)			Channel 633 (red or cyan channel 3)					Normalized signal (signal to noise)
Sample ID	signal	backround	signal to noise	signal	backround	signal to noise		Channel 561 (orange channel 2)	Channel 633 (red or cyan channel 3)
147-001	292	248	44	289	188	101		44	121.918
147-002	325	269	56	331	216	115		56	138.818
147-004	300	239	61	303	194	109		61	131.575
147-006	240	235	5	262	247	15		5	18.1067
147-007	242	220	22	280	180	100		22	120.711
147-008	327	240	87	308	191	117		87	141.232
147-009	310	275	35	313	222	91		35	109.847
147-010	249	209	40	245	165	80		40	96.5689
	Average background:	241.875		Average:	200.375
				Background normalization factor:	0.828424

## Sheet: WK3_Early_Embryos
WK stock #	Name	Insert	insert orientation	insertion site
3	LeimohG	Z-FEDC-G	Z5	-142 eve
Replicate 1
Imaging date	20220119
Embryo sample #	WK196
Probes	GFP 546, LacZ 633
	Channel 561 (orange channel 2)			Channel 633 (red or cyan channel 3)					Normalized signal (signal to noise)
Sample ID	signal	backround	signal to noise	signal	backround	signal to noise		Channel 561	Channel 633
196-000	248	237	11	232	224	8		11	8.80605
196-001	331	268	63	257	242	15		63	16.5113
196-003	283	231	52	201	219	-18		52	-19.8136
196-004	313	266	47	247	237	10		47	11.0076
196-005	379	250	129	247	226	21		129	23.1159
196-006	260	244	16	208	210	-2		16	-2.20151
196-007	312	252	60	232	230	2		60	2.20151
	Average background:	249.714		Average:	226.857
				Background normalization factor:	0.908467
Replicate 2
Imaging date	20220219
Embryo sample #	WK205
Probes	GFP 546, LacZ 633
	Channel 561 (orange channel 2)			Channel 633 (red or cyan channel 3)					Normalized signal (signal to noise)
Sample ID	signal	backround	signal to noise	signal	backround	signal to noise		Channel 561	Channel 633
205-001	354	262	92	223	228	-5		92	-5.91648
205-002	355	257	98	191	192	-1		98	-1.1833
205-003	281	237	44	197	192	5		44	5.91648
205-004	297	217	80	174	184	-10		80	-11.833
205-005	299	210	89	207	198	9		89	10.6497
205-006	220	202	18	205	189	16		18	18.9327
205-007	351	227	124	209	190	19		124	22.4826
205-008	287	236	51	200	192	8		51	9.46637
205-009	277	263	14	195	219	-24		14	-28.3991
	Average background:	234.556		Average:	198.222
				Background normalization factor:	0.845097
Replicate 3
Imaging date	20220112
Embryo sample #	WK130
Probes	GFP 546, LacZ 633
	Channel 561 (orange channel 2)			Channel 633 (red or cyan channel 3)					Normalized signal (signal to noise)
Sample ID	signal	backround	signal to noise	signal	backround	signal to noise		Channel 561	Channel 633
130-001	426	325	101	227	222	5		101	6.61177
130-002	394	266	128	218	217	1		128	1.32235
130-003	465	338	127	221	239	-18		127	-23.8024
130-004	494	333	161	229	238	-9		161	-11.9012
130-005	365	318	47	327	274	53		47	70.0848
130-006	361	230	131	199	182	17		131	22.48
130-007	370	280	90	250	207	43		90	56.8612
130-008	440	325	115	191	227	-36		115	-47.6047
130-009	297	268	29	259	258	1		29	1.32235
130-010	506	328	178	259	213	46		178	60.8283
	Average background:	301.1		Average:	227.7
				Background normalization factor:	0.756227
Replicate 4
Imaging date	20220111
Embryo sample #	WK139
Probes	GFP 546, LacZ 633
	Channel 561 (orange channel 2)			Channel 633 (red or cyan channel 3)					Normalized signal (signal to noise)
Sample ID	signal	backround	signal to noise	signal	backround	signal to noise		Channel 561	Channel 633
139-001	310	215	95	216	218	-2		95	-2.14466
139-002	322	209	113	200	201	-1		113	-1.07233
139-003	304	207	97	197	196	1		97	1.07233
139-004	389	211	178	202	179	23		178	24.6636
139-005	372	205	167	231	224	7		167	7.50632
139-006	308	217	91	222	219	3		91	3.217
139-007	299	211	88	200	192	8		88	8.57865
139-008	300	226	74	229	214	15		74	16.085
139-009	307	220	87	206	167	39		87	41.8209
139-010	380	199	181	196	167	29		181	31.0976
	Average background:	212		Average:	197.7
				Background normalization factor:	0.932547
Replicate 5
Imaging date	20220111
Embryo sample #	WK148
Probes	GFP 546, LacZ 633
	Channel 561 (orange channel 2)			Channel 633 (red or cyan channel 3)					Normalized signal (signal to noise)
Sample ID	signal	backround	signal to noise	signal	backround	signal to noise		Channel 561	Channel 633
148-002	203	188	15	204	183	21		15	26.7273
148-003	409	255	154	194	184	10		154	12.7273
148-004	288	224	64	198	181	17		64	21.6364
148-005	304	249	55	202	191	11		55	14
148-006	307	228	79	210	191	19		79	24.1818
148-007	323	233	90	190	186	4		90	5.09091
148-008	368	279	89	194	193	1		89	1.27273
148-009	357	232	125	211	184	27		125	34.3636
148-010	346	240	106	186	179	7		106	8.90909
	Average background:	236.444		Average:	185.778			0	0
				Background normalization factor:	0.785714

## Sheet: WK3_Late_Embryos
WK stock #	Name	Insert	insert orientation	insertion site
3	LeimohG	Z-FEDC-G	Z5	-142 eve
Replicate 1
Imaging date	20220309
Embryo sample #	WK210
Probes	GFP 546, LacZ 633
	Channel 561 (orange channel 2)			Channel 633 (red or cyan channel 3)					Normalized signal (signal to noise)
Sample ID	signal	backround	signal to noise	signal	backround	signal to noise		Channel 561	Channel 633
210-001	311	225	86	165	174	-9		86	-13.8979
210-002	443	340	103	192	203	-11		103	-16.9863
210-003	365	276	89	187	184	3		89	4.63263
210-004	366	331	35	219	227	-8		35	-12.3537
210-005	525	395	130	239	235	4		130	6.17684
210-006	441	310	131	206	202	4		131	6.17684
210-007	362	315	47	202	190	12		47	18.5305
210-008	508	345	163	210	199	11		163	16.9863
210-009	376	313	63	225	218	7		63	10.8095
210-010	356	311	45	193	215	-22		45	-33.9726
	Average background:	316.1		Average:	204.7
				Background normalization factor:	0.64758
Replicate 2
Imaging date	20220219
Embryo sample #	WK196
Probes	GFP 546, LacZ 633
	Channel 561 (orange channel 2)			Channel 633 (red or cyan channel 3)					Normalized signal (signal to noise)
Sample ID	signal	backround	signal to noise	signal	backround	signal to noise		Channel 561	Channel 633
196-001	539	284	255	295	277	18		255	18.1723
196-002	277	202	75	224	217	7		75	7.067
196-003	461	243	218	247	230	17		218	17.1627
196-004	440	263	177	291	289	2		177	2.01914
196-005	486	243	243	240	224	16		243	16.1531
196-006	309	252	57	271	270	1		57	1.00957
196-007	379	230	149	254	212	42		149	42.402
196-008	378	259	119	268	245	23		119	23.2201
196-009	374	217	157	260	210	50		157	50.4786
196-010	378	233	145	213	229	-16		145	-16.1531
	Average background:	242.6		Average:	240.3
				Background normalization factor:	0.990519
Replicate 3
Imaging date	20220219
Embryo sample #	WK205
Probes	GFP 546, LacZ 633
	Channel 561 (orange channel 2)			Channel 633 (red or cyan channel 3)					Normalized signal (signal to noise)
Sample ID	signal	backround	signal to noise	signal	backround	signal to noise		Channel 561	Channel 633
205-001	326	241	85	202	194	8		85	9.16453
205-002	353	249	104	220	213	7		104	8.01897
205-003	296	222	74	225	186	39		74	44.6771
205-004	312	224	88	201	186	15		88	17.1835
205-005	295	218	77	215	198	17		77	19.4746
205-006	351	242	109	210	198	12		109	13.7468
205-007	321	233	88	206	202	4		88	4.58227
205-008	510	332	178	355	342	13		178	14.8924
205-009	316	214	102	223	191	32		102	36.6581
205-010	335	241	94	213	199	14		94	16.0379
	Average background:	241.6		Average:	210.9
				Background normalization factor:	0.87293
Replicate 4
Imaging date	20220111
Embryo sample #	WK130
Probes	GFP 546, LacZ 633
	Channel 561 (orange channel 2)			Channel 633 (red or cyan channel 3)					Normalized signal (signal to noise)
Sample ID	signal	backround	signal to noise	signal	backround	signal to noise		Channel 561	Channel 633
130-001	369	273	96	242	221	21		96	26.1331
130-002	601	330	271	295	275	20		271	24.8887
130-003	415	293	122	263	261	2		122	2.48887
130-004	435	304	131	267	255	12		131	14.9332
130-005	366	271	95	224	214	10		95	12.4443
130-006	404	301	103	222	214	8		103	9.95548
130-007	369	266	103	224	214	10		103	12.4443
130-008	366	270	96	210	203	7		96	8.71104
130-009	358	269	89	194	190	4		89	4.97774
130-010	345	218	127	200	199	1		127	1.24443
	Average background:	279.5		Average:	224.6
				Background normalization factor:	0.803578
Replicate 5
Imaging date	20220111
Embryo sample #	WK139
Probes	GFP 546, LacZ 633
	Channel 561 (orange channel 2)			Channel 633 (red or cyan channel 3)					Normalized signal (signal to noise)
Sample ID	signal	backround	signal to noise	signal	backround	signal to noise		Channel 561	Channel 633
139-002	343	198	145	189	186	3		145	3.06849
139-003	362	201	161	204	193	11		161	11.2511
139-004	321	194	127	215	200	15		127	15.3425
139-005	383	174	209	200	194	6		209	6.13699
139-006	359	185	174	197	185	12		174	12.274
139-007	368	205	163	218	200	18		163	18.411
139-008	317	207	110	221	217	4		110	4.09132
139-009	346	199	147	172	155	17		147	17.3881
139-010	346	229	117	230	222	8		117	8.18265
	Average background:	199.111		Average:	194.667			0	0
				Background normalization factor:	0.977679
Replicate 6
Imaging date	20220111
Embryo sample #	WK148
Probes	GFP 546, LacZ 633
	Channel 561 (orange channel 2)			Channel 633 (red or cyan channel 3)					Normalized signal (signal to noise)
Sample ID	signal	backround	signal to noise	signal	backround	signal to noise		Channel 561	Channel 633
148-001	305	209	96	212	195	17		96	19.8166
148-002	333	224	109	199	179	20		109	23.3137
148-003	373	274	99	222	219	3		99	3.49705
148-004	326	233	93	212	198	14		93	16.3196
148-005	436	232	204	239	224	15		204	17.4853
148-006	340	237	103	212	186	26		103	30.3078
148-007	350	236	114	240	216	24		114	27.9764
148-008	445	235	210	227	217	10		210	11.6568
148-009	333	229	104	200	172	28		104	32.6391
148-010	399	262	137	243	228	15		137	17.4853
	Average background:	237.1		Average:	203.4
				Background normalization factor:	0.857866
